# Supplementary material for: Some Accessions of Amazonian Wild Rice (Oryza glumaepatula) Constitutively Form a Barrier to Radial Oxygen Loss along Adventitious Roots under Aerated Conditions
Source: PubMed Central journal article supplement (PMC7412225; doi:10.3390/plants9070880), 2020-07-13
Supplement: plants-09-00880-s001.pdf [file plants-09-00880-s001.pdf]

# Supplementary Materials

**Some Accessions of Amazonian Wild Rice (*Oryza glumaepatula*)  
Constitutively Form a Barrier to Radial Oxygen Loss along Adventitious  
Roots under Aerated Conditions**

**Masato Ejiri, Yuto Sawazaki and Katsuhiko Shiono \* \***

\*Corresponding author: Katsuhiko Shiono (E-mail: shionok@fpu.ac.jp)

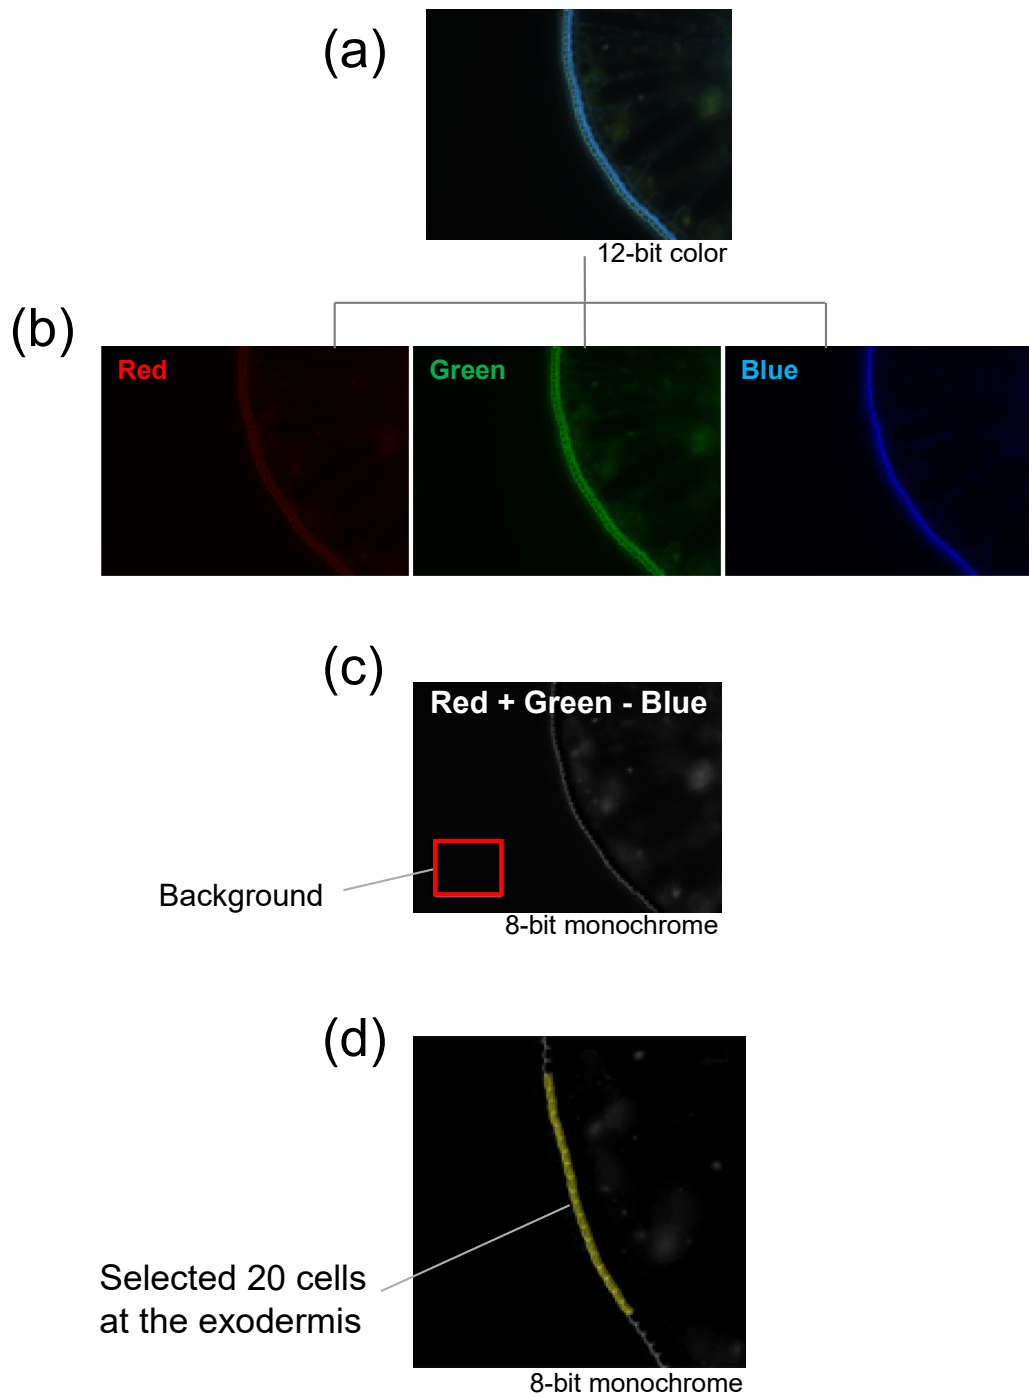

**Supplemental Figure 1.** Procedure for quantifying Fluorol Yellow 088 fluorescence intensity. **(a)** Original 12-bit color image. **(b)** Splitting the image into red, green, and blue. **(c)** Calculation of yellow intensity. For each pixel, the yellow intensity was calculated as the sum of the red and green intensities minus the blue intensity. **(d)** Image to select 20 cells at the exodermis as a region-of-interest (ROI).

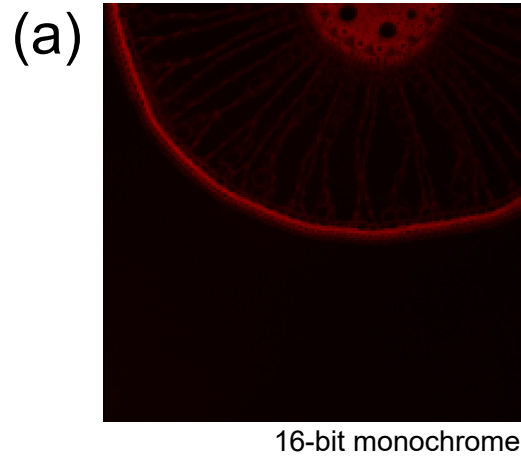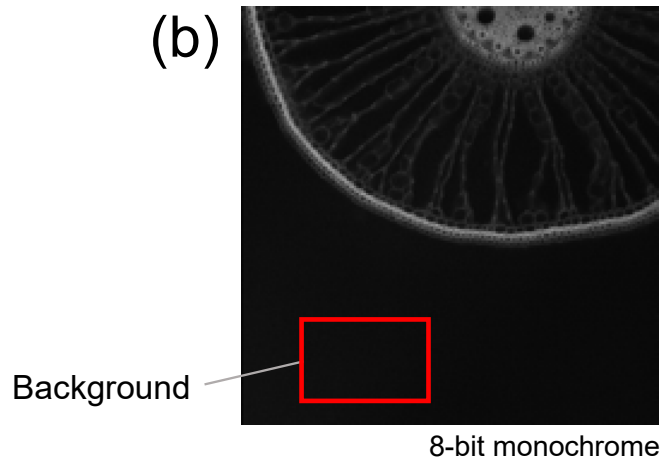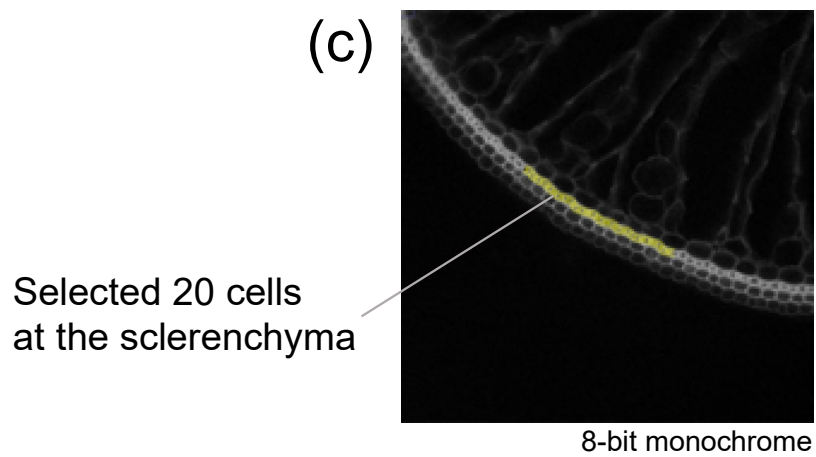

**Supplemental Figure 2.** Procedure for quantifying Basic Fuchsin fluorescence intensity. (a) Original 16-bit monochrome image as shown by red pseudo-color. (b) 8-bit monochrome image. (d) Image to select 20 cells at the sclerenchyma as a region-of-interest (ROI).
